## **BDNF and Tau as biomarkers of severity in Multiple Sclerosis**

Islas-Hernandez Azul<sup>1</sup>, Aguilar-Talamantes Hugo Seacatl<sup>2</sup>, Bertado-Cortes Brenda<sup>3</sup>, Mejia-delCastillo Georgina de Jesus<sup>3</sup>, Carrera-Pineda Raul<sup>3</sup>, Cuevas-Garcia Carlos<sup>4</sup> and Garcia-delaTorre Paola<sup>1\*</sup>

1 Unidad de Investigación en Enfermedades Neurológicas, UMAE Hospital de Especialidades, Centro Medico Nacional SXXI, Instituto Mexicano del Seguro Social, Ciudad de Mexico, Mexico

2 Hospital Psiquiátrico Héctor Tovar Acosta, Insituto Mexicano del Seguro Social.

3 Servicio de Neurología, UMAE Hospital de Especialidades, Centro Medico Nacional SXXI, Instituto Mexicano del Seguro Social, Ciudad de Mexico, Mexico

4 UMAE Hospital de Especialidades, Centro Medico Nacional SXXI, Instituto Mexicano del Seguro Social, Ciudad de Mexico, Mexico

\*Corresponding author: Garcia-delaTorre P, Unidad de Investigación en Enfermedades Neurológicas, UMAE Hospital de Especialidades, Centro Medico Nacional SXXI, Instituto Mexicano del Seguro Social, Cuauhtemoc 330, Col. Doctores, Ciudad de Mexico, Mexico, Tel: +52 55 55780240, Email: [pgarciatorre@gmail.com](mailto:pgarciatorre@gmail.com)

Keywords: multiple sclerosis, tau, brain-derived neurotrophic factor, multiple sclerosis severity score.

## **BDNF and Tau as biomarkers of severity in Multiple Sclerosis**

### **Abstract**

It has been difficult to establish reliable biomarkers for multiple sclerosis due to the complex disease mechanisms. The pathophysiology is expressed in three main compartments: peripheral blood, the BBB, and the CNS. BDNF is a neurotrophin that potentiates proliferation of oligodendrocytes and myelination. Tau is a microtubule assembly phosphoprotein. Our purpose was to determine if serum levels of tau and BDNF could be used as severity biomarkers in multiple sclerosis. We measured total tau and BDNF by western blot and found increased tau and decreased BDNF in MS patients compared to controls. Serum total-tau has a peak in RRMS and falls to normal values in SPMS. BDNF levels were lower in all MS patients, compared to healthy controls. BDNF seems like a good biomarker for diagnosis since it always decreases in MS patients, but for our population, not for severity or progression. Tau was increased in RRMS, in the second decile of the MSSS and even in the lowest EDSS. We also found that in SPMS and the most severe cases measured by either EDSS or MSSS, tau returns to normal levels, suggesting an active role for this protein in MS.

Keywords: multiple sclerosis; tau; brain-derived neurotrophic factor; multiple sclerosis

## Introduction

Neurodegenerative diseases have all been found to have a multifactor etiology. The more we study them, the harder it is to make an association between biomarkers and disease that works for every patient. A simple quantification of biomarkers gives no advantage to the daily clinician. Here, we have studied the biomarkers we thought would give us more useful information about MS patients. A biomarker is defined as a characteristic that is objectively measured and evaluated as an indicator of a normal biological process, pathogenic process, or pharmacologic responses to a therapeutic intervention [1].

For MS, the pathophysiology is expressed in three main compartments: peripheral blood, the blood brain barrier and the central nervous system [2]. Post-mortem cerebral tissue is an excellent source, but its use is impractical when it comes to diagnosis. Hence, corporal fluids such as plasma have been the most common choice for the analysis of biomarkers. Peripheral blood biomarkers are readily available, and its perfusion through different organs and tissues can result in the addition or modification of proteins that may vary according to different conditions [2], [3].

Multiple sclerosis (MS) is a neurodegenerative, chronic inflammatory, demyelinating disease of a multifactor etiology. The new MS classification divides this disease into relapsing-remitting (RR) and progressive, which is sub-classified in primary progressive (PP) and secondary progressive (SP) [4]. Despite the significant amount of studies in MS, the only validated biomarker is the detection of oligoclonal IgG bands in the CSF, which is used as an adjuvant tool for diagnosis [2].

Individual variations in its clinical course make it hard to evaluate severity in MS. There are three important scales for classifying severity in patients with MS; the most common is the Expanded Disability Status Scale (EDSS), which is a method of quantifying disability and monitoring changes over time [5]. Then there is the Multiple Sclerosis Severity Score (MSSS) that compares individual EDSS scores with the distribution of EDSS in patients who have had MS for the same length of time [6]. Finally, there is the Multiple Sclerosis Functional Composite (MSFC) which is a 3 part standardized, quantitative, assessment instrument developed to reflect the clinical expression of MS [7].

Here, we intended to link a combination of biomarkers, to the severity and the time of diagnosis of MS patients to introduce these tests as an aid for clinicians. We have chosen the brain-derived neurotrophic factor (BDNF) and tau as the biomarkers to be evaluated in serum of MS patients.

BDNF is a neurotrophin that, amongst other things, promotes neuronal survival and potentiates proliferation of oligodendrocytes and myelination. Some authors have proposed a protective role for endogenous BDNF in the nervous system. One study showed increased expression of BDNF receptor TrkB in naked axons, in a murine model of MS, suggesting a regulation of expression by neuroinflammation. In their study, they achieved to diminish the severity of the disease by injecting T-cells that overexpressed BDNF, proposing direct axonal protection by this factor [8].

Beneficial effects of drugs such as laquinimod have been related to an increased production of BDNF [9]. Also, levels of BDNF in patients with RRMS treated with glatiramer acetate have been found to be similar to controls and elevated compared to patients treated with

interferon  $\beta$  [10]. These data suggest a neuroprotective effect of BDNF on the immune system of the patients with MS.

Furthermore, tau is a microtubule assembly phosphoprotein that participates in axonal locomotion, as well as in intraneuronal transport and was first described as a facilitator for microtubule assembly [11]. Its physiological roles are stabilization of microtubules and maintaining the shape and structural polarization of neurons [12]. Tau has been used as a biomarker for axonal damage [13] since its levels have been reported to increase in various CNS diseases [14].

In contrast with BDNF, reports relating tau and MS are controversial. Some report an increment of the protein in CSF [15],[16], while others a decrement [17] or no significant differences [18]. Terzi and coworkers [16] found increased total tau (T-tau) in patients with MS compared with controls, and revealed a strong correlation between T-tau and the duration of the disease in every patient. Also, Bartosik-Psujek [19] and his group have reported increased T-tau in the serum of patients with MS compared with controls.

On the other hand, Jaworski [17] reported decreased levels of CSF T-tau in MS patients but more T-tau in RR-MS than SP-MS. Finally, Jiménez-Jiménez [18] concludes that T-tau cannot be used as a biomarker for MS since they did not find any differences between patients and controls.

We used serum of MS patients to quantify tau and BDNF and used the expanded disability status scale (EDSS), years of diagnosis, and the multiple sclerosis severity score (MSSS) to evaluate the usefulness of these molecules for diagnosis.

## **Methods**

### ***Ethics statement***

All work was conducted with the formal approval of the human subject committees. The ethical and science committees of the Instituto Mexicano del Seguro Social (study number R-2012-785-049) approved the study. All participants gave written informed consent. This study was performed according to the World Medical Association Declaration of Helsinki.

All patients have given written consent for the study, including the acknowledgment of full anonymity. Mandatory health and safety procedures have been complied with in the course of the study.

### ***Study***

Prospective recruitment of all participants was done in the Neurology Service of the Specialties Hospital in Centro Médico Nacional Siglo XXI of the Instituto Mexicano del Seguro Social, Mexico City, Mexico.

We used an observational cause-effect, ambispective study design.

### ***Subjects***

Only subjects that agreed to participate and signed the letter of informed consent were included in this study. Inclusion criteria included subjects with multiple sclerosis diagnoses according to McDonald 2010, older than 18 and younger than 55 years, and any treatment. Exclusion criteria included subjects with any other autoimmune pathology. Controls were also older than 18 and younger than 55 years but with no multiple sclerosis or any other autoimmune pathology diagnosis.

## Consort diagram

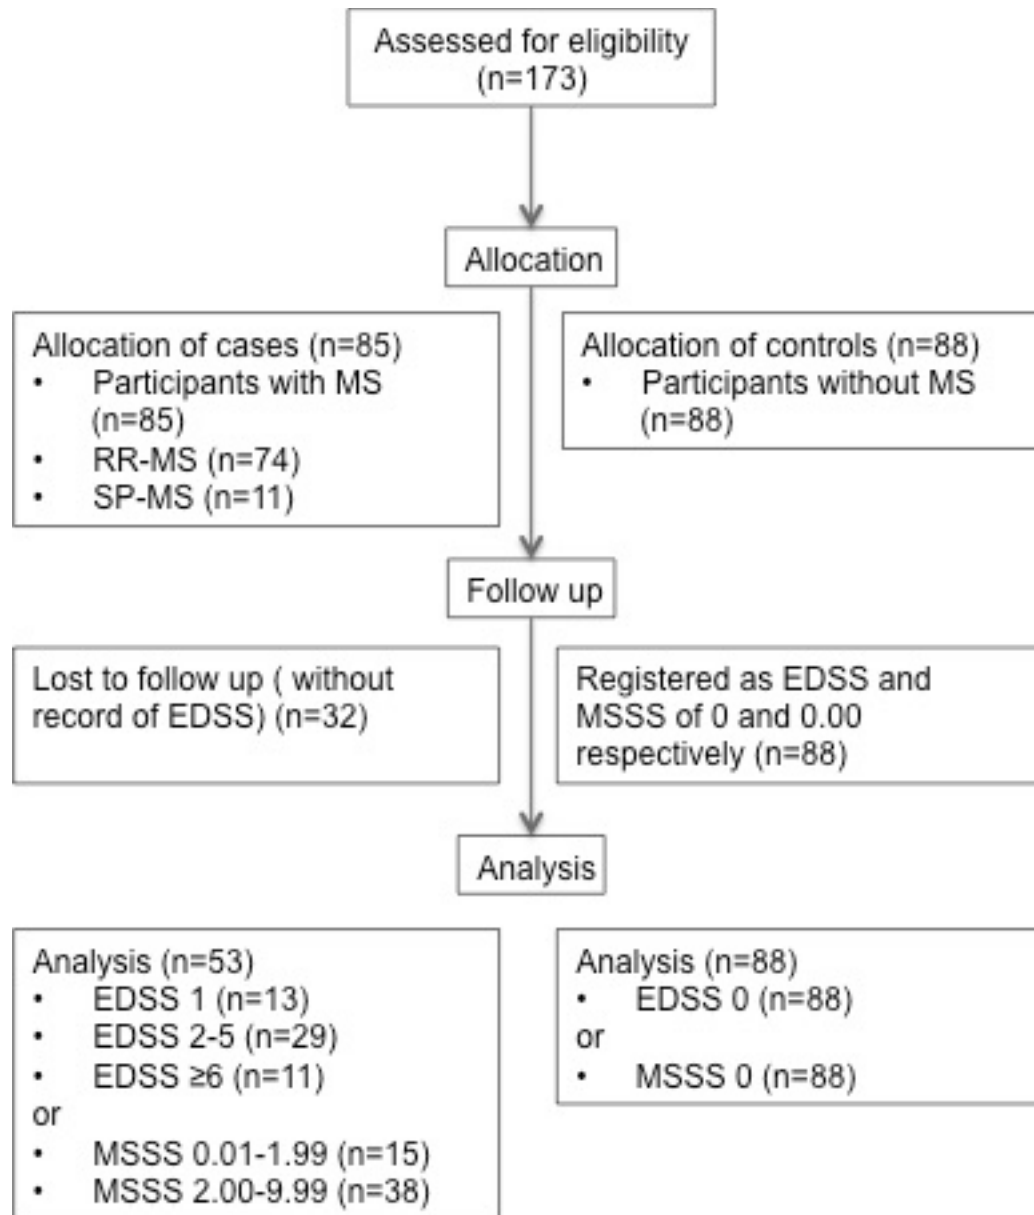

## Measurement of BDNF and Tau

Blood was collected in anticoagulant-free tubes and centrifuged at 2000g for 10min at 4°C. Serum was collected, and samples were stored at -20°C for further use. Standard Western blotting analysis was performed to detect BDNF levels in serum.

Protein concentrations were measured using the DCTM Protein Assay Kit (BioRad); 60 µg of protein per sample were separated by 14% sodium dodecyl sulphate-polyacrylamide gel electrophoresis. Samples were electrotransferred onto a polyvinylidene fluoride membrane (BioRad) and subsequently blocked with 3% skim milk in TBS-T at 4° overnight. The membranes were incubated 120 min at room temperature with rabbit polyclonal antibody against BDNF (Santa Cruz; sc-546; 1:1000 dilution) or Tau (Thermo Scientific; PA5-16380; 1:1000 dilution) and rabbit monoclonal antibody against Transferrin used as an internal control (Santa Cruz; sc-30159; 1:500 dilution). Blots were then incubated with horseradish peroxidase-conjugated goat anti-rabbit IgG (1:20000; PI-1000, Vector Labs, USA) in TBS-T, for 2 hrs at room temperature. Protein bands were identified using chemiluminescence (Luminata™ Classico Western HRP Substrate) and measured by densitometry using ImageJ software. We used transferrin as normalization control and for each sample relative abundance of the protein of interest was determined by calculating the ratio of the intensity of the signal for the protein of interest to that of the normalization control.

### ***Statistical analysis***

A simple ANOVA was used to evaluate differences between groups of serum tau and a Kruskal-Wallis for BDNF values. The Spearman correlation coefficient was used for BDNF and Tau. A chi-square test was used to compare cut points of BDNF and tau in MS patients and controls. A binary logistic model was used to evaluate the presence or absence of MS with BDNF and tau as independent variables adjusted by the dummy variables of severity by the MSSS as a function of z, as suggested for biomarker's logistic analysis [20].



## Results

A total of 173 subjects were included in this study, 102 were women, and 71 were men with a mean age of  $41 \pm 12.0$  years; eighty-five were MS patients and eighty-eight controls (without MS). Table 1 comprises the general characteristics of our population.

An 86% of the MS patients were RR-MS, and 14% were SP-MS. Twenty percent of the MS population was smokers, and 49% had comorbidity (the most frequent being an affective disorder with 12%). While 37% were treated with glatiramer acetate, 63% received other treatment (INF 12, 6, 8, Fingolimod or Mitoxantrone). The only difference in the measured values was BDNF specifically in the population with more than ten years of MS diagnostic (24%) with a  $p=0.1$ .

| <b>Table 1. Demographic data.</b> |                     |                                                     |
|-----------------------------------|---------------------|-----------------------------------------------------|
| <b>Variables.</b>                 | <b>Total sample</b> | <b>Total</b>                                        |
| Average age                       | 41.3 (+/- 11.74)    | 173                                                 |
| Women                             | 102                 | P= 0.002                                            |
| Men                               | 71                  | BDNF•<br>P= =0.053 tau•                             |
| BDNF                              | 1.31 mean           | P= 0.924                                            |
| tau                               | 1.16 median         | BDNF *<br>P= 0.467 tau +<br>(Difference by gender). |
|                                   | <b>Controls</b>     | 88                                                  |
| Women                             | 52                  | P= 0.681*                                           |
| Men                               | 36                  | Difference BDNF<br>P= 0.266+<br>Difference tau      |

|                                                     |                              |          |                                                    |
|-----------------------------------------------------|------------------------------|----------|----------------------------------------------------|
| BDNF<br>tau                                         | 1.1412 Median<br>1.1075 Mean |          | *IR = 0.4598<br>*SE = 0.3239                       |
| <b>Patients with MS</b>                             |                              |          |                                                    |
|                                                     | RR<br>74                     | SP<br>11 | 85                                                 |
| Women                                               | 42                           | 8        | 50<br>P= 0.343 *<br>Difference<br>BDNF             |
| Men                                                 | 32                           | 3        | 35<br>P= 0.19*<br>Difference tau                   |
| Age                                                 | 39.88                        | 50.73    | 41.30 mean<br>(+/- 11.74)<br>10.85<br>(difference) |
| Diagnostic age                                      | 32.41                        | 35.91    |                                                    |
| Years of<br>diagnosis                               | 6.98                         | 13.9     |                                                    |
| EDSS                                                | 45                           | 8        | 53 (62.35%),<br>32 Lost                            |
| 1                                                   | 11                           | 2        | 13                                                 |
| 05-feb                                              | 26                           | 3        | 29                                                 |
| >6                                                  | 8                            | 3        | 11                                                 |
| MSSS                                                |                              |          | 53                                                 |
| 0.01-1.99                                           | 15                           |          |                                                    |
| 2.00-9.99                                           | 38                           |          |                                                    |
| BDNF<br>tau                                         | 1.2148 Median<br>1.2189 Mean |          | *IR= 0.4635<br>*SE= 0.3111                         |
| *U of Mann-Whitney, +t-student, •Kolmogorov-Smirnof |                              |          |                                                    |

A normal distribution was found for serum values of tau but not for BDNF. BDNF values were analysed with non-parametric tests. We found increased Tau and decreased BDNF in the serum of MS patients compared to controls ( $p < 0.05$  and  $p < 0.001$  respectively). In this

context, we found no significant differences in gender or age of MS patients (Table 1). Differences between MS patients and controls for BDNF and tau are shown in figure 1.

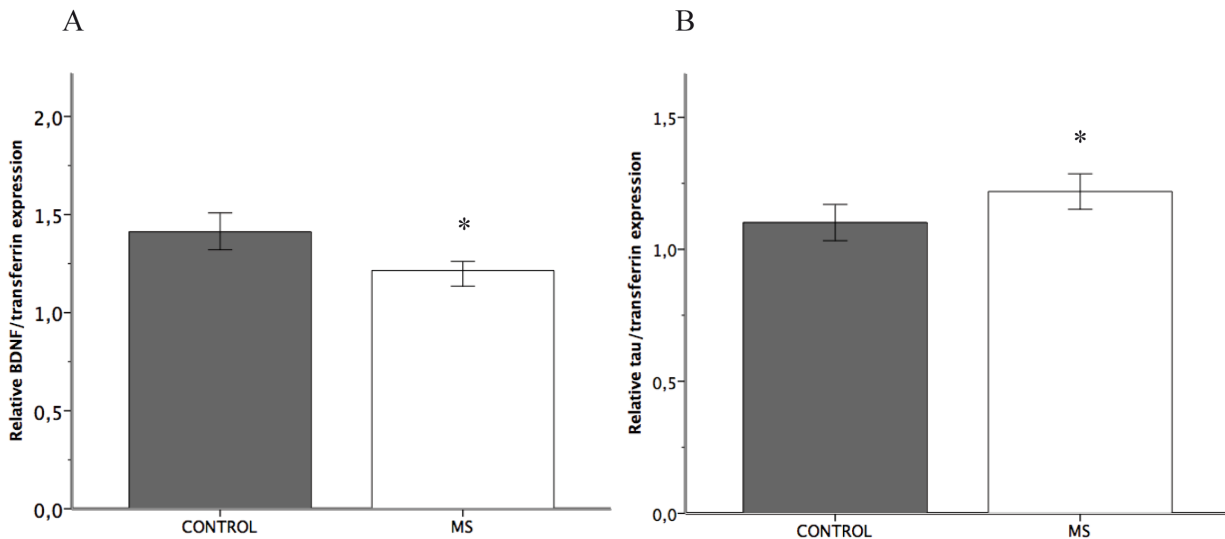

**Figure 1.** BDNF and Tau in serum of controls and MS patients. A) BDNF serum concentration is higher in controls (gray) than in multiple sclerosis patients (white). Data is shown as BDNF expression relative to transferrin \*  $p < 0.05$  B) Tau serum concentration in controls (gray) is lower than in multiple sclerosis patients (white). Data is shown as tau protein relative to transferrin expression \*  $p < 0.05$

A simple ANOVA test showed differences between controls, RR-MS, and SP-MS ( $p < 0.05$ ). A Tukey test showed a significant increment of tau in RR-MS patients as seen in figure 2-A. When the values were compared according to EDSS scores, we found a significant increase in serum tau values for patients with an EDSS of 1 compared with 2-5 and >6 (Figure 2-B).

The same analysis for BDNF serum values with a Kruskal-Wallis test found differences between MS and control groups ( $p < 0.001$ ) with no differences between RR-MS and SP-MS patients. A similar result was found when tested using EDSS values ( $p < 0.05$ ) where differences were only with controls but not between EDSS groups. Reduction in serum BDNF was not significant after the commencement of the disease (Figure 2-B).

When the MSSS was used to classify MS patients by severity, a simple ANOVA showed differences for serum tau ( $p < 0.05$ ) with significant differences between the 1<sup>st</sup> and 2<sup>nd</sup> decile (0.01-1.99). A Kruskal-Wallis was used to evaluate serum BDNF, a significant difference was found ( $p < 0.05$ ) only in comparison with controls but not between deciles of the MSSS (Figure 2-C).

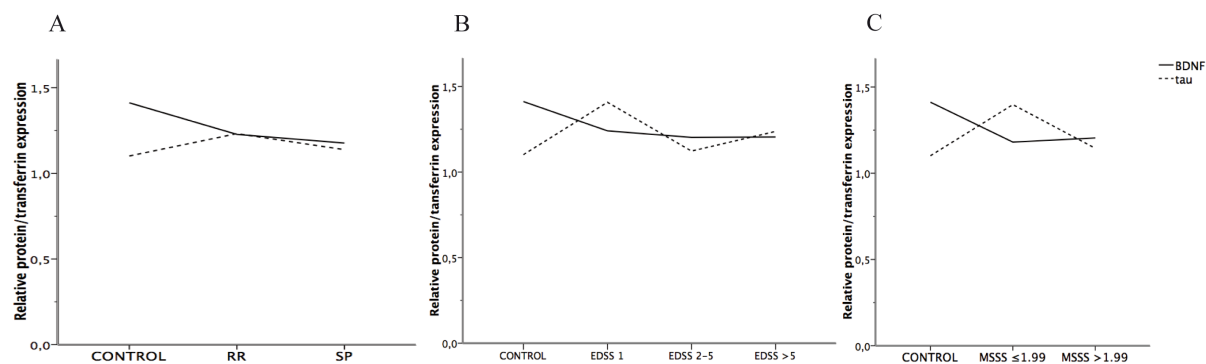

**Figure 2.** Expression of BDNF and tau relative to severity of multiple sclerosis. A) BDNF (solid line) decreases with both MS clinical courses (RR and SP) while tau (dotted line) increases in RR-MS patients and returns to normal values in SP-MS patients; B) values of BDNF (solid line) and tau (dotted line) according to the EDSS score where BDNF decreases in all categories and tau increases when EDSS is 1 but returns to normal values when EDSS is higher; and C) BDNF (solid line) and tau (dotted line) values according to MSSS, BDNF decreases in MS patients independently of MSSS but tau increases when MSSS is lower than 1.99 and returns to normal values when higher than 1.99.

No statistical correlation was found for BDNF and tau ( $p = 0.153$ ) with a condition index of 1 and a condition number of 7.99. This data showed a low collinearity between variables as a possible non-linear negative association within the participants with a lower MSSS. Hence, the values of BDNF  $< 1.1$  and tau  $> 1.3$  as risk variables were used. A changing association between these biological variables depending on years of diagnosis and MSSS values is shown in Table 2.

| <b>Table 2.</b> Odds ratio (OR) and 95% confidence intervals (CI) for the association of BDNF, tau and Multiple Sclerosis risk. |                |                         |                         |
|---------------------------------------------------------------------------------------------------------------------------------|----------------|-------------------------|-------------------------|
| <b>Variables</b>                                                                                                                | <b>P value</b> | <b>Correlation (SE)</b> | <b>OR (CI 95%)</b>      |
| MS vs CTRL                                                                                                                      |                |                         |                         |
| BDNF < 1.10000                                                                                                                  | 0.005          | 0.214 (0.073)           | 2.834;<br>1.349 – 5.955 |
| tau > 1.30000                                                                                                                   | 0.177          | 0.103 (0.75)            | 1.600; 0.806 – 3.178    |
| MSSS 1 vs 2 *                                                                                                                   |                |                         |                         |
| BDNF < 1.10000                                                                                                                  | 0.726          | -0.048 (0.134)          | 7.88; 0.208 – 2.989     |
| tau > 1.30000                                                                                                                   | 0.153          | 0.196 (0.142)           | 2.45; 0.705 – 8.51      |
| *MSSS 0.01-1.99= 1, MSSS 2.00-9.99= 2.<br>Chi square test.                                                                      |                |                         |                         |

Finally, in Table 3, the R<sup>2</sup> value of the binary logistic model is presented for serum BDNF and tau adjusted by the dummy variables created from the values of MSSS considering values between 0.01 and 1.99 finding variance values of 73.4-100%.

| <b>Table 3.</b> Association of BDNF and tau in patients with Multiple Sclerosis adjusted by MSSS. |                |                                       |                                    |
|---------------------------------------------------------------------------------------------------|----------------|---------------------------------------|------------------------------------|
| <b>Variables in the Model.</b>                                                                    | <b>P value</b> | <b>R<sup>2</sup> of Cox and Snell</b> | <b>R<sup>2</sup> of Negelkerke</b> |
| Complete Model                                                                                    | 0.000          | 0.734                                 | 1.000                              |
| BDNF <1.10000                                                                                     | 0.028          |                                       |                                    |
| tau > 1.30000                                                                                     | 0.167          |                                       |                                    |
| MSSS 0 = CTRL                                                                                     | 0.000          |                                       |                                    |
| MSSS 0.01-1.99                                                                                    | 0.000          |                                       |                                    |
| MSSS 2.00-9.99                                                                                    | 0.000          |                                       |                                    |
| MSSS                                                                                              | 0.000          |                                       |                                    |
| 0.01-1.99*tau > 1.30000                                                                           |                |                                       |                                    |

## Discussion

It has been previously suggested that the decreased BDNF levels observed in MS patients are due to a deficient regulation of the immune response, either by immune cells exhaustion due to the attempts at tissue regeneration and repair of neuronal damage, or by the inhibition of its neuroprotective function [21], [10]. In agreement with other studies [21],[8], we found serum BDNF decreased in MS patients compared with controls.

When the MSSS was applied to our population [6], we found no differences by severity, but a decrement in comparison to controls. Therefore, BDNF seems like a good biomarker for diagnosis since it has always been found to decrease in MS patients, but not for severity or progression, at least not for our population.

Recently, a decrement in plasma BDNF in male patients newly detected with MS was found [22], and it was proposed that this early decrease is due to the stress of being diagnosed with the disease. On that matter, relapse of MS patients has also been associated with anxiety and depression episodes. Furthermore, MS patients can debut with depressive symptoms and resistant to treatment [23].

On this same lane of thought, leading epidemiological studies of medical comorbidities in patients with MS show major depressive disorder (MDD) as the most common, reaching up to 7 fold in MS population relative to controls [24]. One of the difficulties of this study was the fact that we did not take comorbidity into account because of the lack of information, especially those related to mental health. MDD would be of particular interest, since these patients, even when MS is not present, have also shown decreased serum BDNF levels [25], [26].

We found a low correlation of BDNF with MS diagnosis; values under 1.1 were 1.8 times more associated with MS than with controls. It appears as if BDNF decreases at the beginning of the disease, where one of the most common clinical manifestations is chronic or recurrent depression, but acute affective symptoms are not always expressed. Accordingly, suicide has been found to occur up to 3 times more in MS patients than in the general population, becoming one of the leading causes of death in this particular group [27].

Also, interleukins 1a, 1b, and 6, TNF-alfa, or C-reactive protein have been widely described elevated in MS patients [28] as in patients with psychiatric manifestations mainly expressing psychosomatic symptoms [29],[30]. At this time, we were unable to measure inflammation biomarkers, but we believe that the difference found between RR and SP could be related to the inflammation process of MS, where RR-MS patients have been found to have a more acute inflammation response than SP-MS patients.

We also evaluated T-tau in the serum of MS patients, and unlike BDNF, tau has been reported to increase [15],[16],[31], diminish [17] or even have no change [18] in patients with MS. For our population, we found elevated serum T-tau in MS patients compared with controls in concordance with some of the literature [15],[16],[31].

For tau, there seems to be a different dynamic than for BDNF, in which the latter decreases with the disease but has no changes within the progression. Tau, on the other hand, is increased in RR-MS, in the second decile of the MSSS and even in the lowest EDSS, which is what we expected. However, in SP-MS and the most severe cases measured by either EDSS or MSSS, tau returns to normal levels, suggesting an active role for this protein in MS.

On that matter, Jaworski and coworkers found a reduction in CSF T-tau between RR and SP-MS patients, proposing that since the SP stage has a predominant neurodegenerative mechanism, that results in a decreased neuronal density and higher cerebral atrophy, that ends in a loss of tau resources and thus lower T-tau in CSF. The negative correlation between tau concentration in CSF and the degree of motor disability measured by EDSS proposed that tau may be indirectly reflecting the extent of neuronal loss [17].

Nonetheless, our measurements were done in serum and not in CSF, and it has been stated that CSF and serum tau have no correlation [32]. On this matter, it has been suggested that tau in serum is found mainly when neurologic disorders are associated to damage of the brain-blood barrier (BBB) [32]. This has been the case for strokes or head traumas, when indeed the BBB is thought to be impaired rapidly, leading to quick leakage of large concentrations of tau protein into the CSF while on chronic conditions, tau is continuously released into the CSF. The current theory about MS pathophysiology proposes that during relapses, the protein is released from damaged axons, but its levels are limited because of axon and BBB repair during recovery [17],[33].

A malfunction of the BBB is one of the earliest cerebrovascular abnormalities seen in MS; the breakdown is thought to be transient although recurrence may be observed and this is believed to be in part a cause of the disease [34]. Proinflammatory cytokines promote BBB breakage when a relapse occurs in MS patients. Hence, we believe our results have more to do with Sjörgen's hypothesis of tau being a BBB damage marker in serum [32] instead of an extrapolation of what Jaworski suggested from his results of T-tau in CSF of a decreased neuronal density in SPMS patients [19].



The truth is, not enough has been studied when it comes to serum tau, in part because of the lack of standardized methods to measure it due to its low levels [35], and also because of the interpretation of its presence in serum [17].

The use of BDNF or tau as biomarkers for MS is not new. We attempted not only to identify differences between patients and controls or even differences between RR and SP, which we did find. Our purpose was also to evaluate the usage of these biomarkers for clinicians. So, even though significant changes were observed for both selected biomarkers, when we approached the data with a more careful statistical study, we found no use for progression diagnosis.

It does not mean that BDNF or tau have no biological meaning or clinical use. A proven effect of BDNF is directly related to remyelination [36], and neuroprotection [8] in neuroinflammation and the changes in this neurotrophic factor can help with individual assessment of the patient. We believe particular attention in regards to levels of BDNF and MS comorbidity with MDD is warranted. And as for tau, it can have application as a possible prognostic factor to predict progression for CIS to MS as it has been shown in some initial studies [33] but not as a single prognosis biomarker.

Henceforth, in order to use BDNF and tau as biological variables in a predictive model of MS, we believe a few points must be considered: 1) for our population the cut point for BDNF was  $<1.1$  and for tau  $>1.3$  to be used as associated factors to MS; 2) tau does not have a linear association with MSSS with an increase in the patients grouped in the second decile and then returning to normal values, 3) establish the absence of psychiatric comorbidities

(mainly affective and anxiety-related) or at least introduce inflammatory variables as a confounding factor, and finally, 4) incorporate image criteria as an independent covariate.

## **Conclusion**

BDNF seems like a good biomarker for diagnosis since it has always been found to decrease in MS patients, but not for severity or progression, at least not for our population. Tau was increased in RRMS, in the second decile of the MSSS and even in the lowest EDSS. We also found that in SPMS and the most severe cases measured by either EDSS or MSSS, tau returns to normal levels, suggesting an active role for this protein in MS.

## **Acknowledgments**

This work was supported by Fondo de Investigación en Salud, Instituto Mexicano del Seguro Social with grant number FIS/IMSS/PROT/G12/1129. We thank Dr. Luisa Melina Espaillat Solano for her contributions while in the Neurology Service.

## **Disclosure statement**

We declare no conflict of interests.

## **References**

1. Mouhieddine TH, El Houjeiri L, Sabra M, Hayes RL, Mondello S. CNS Trauma Biomarkers and Surrogate Endpoints Pipeline from Bench to Bedside: A Translational Perspective. In: *Brain Neurotrauma: Molecular, Neuropsychological, and Rehabilitation Aspects*. (2015).
2. D'Ambrosio A, Pontecorvo S, Colasanti T, Zamboni S, Francia A, Margutti P. Peripheral blood biomarkers in multiple sclerosis. *Autoimmun. Rev.* 14(12), 1097–1110 (2015).
3. Becher B, Prat A, Antel JP. Brain-immune connection: Immuno-regulatory properties of CNS-resident cells. *Glia.* 29(4), 293–304 (2000).

4. Lublin FD, Reingold SC, Cohen JA, *et al.* Defining the clinical course of multiple sclerosis: The 2013 revisions. *Neurology*. 83(3), 278–286 (2014).
5. Kurtzke JF. Rating neurologic impairment in multiple sclerosis: An expanded disability status scale (EDSS). *Neurology*. 33(11), 1444–1444 (1983).
6. Roxburgh R, Seaman SR, Masterman T, *et al.* Multiple Sclerosis Severity Score: Using disability and disease duration to rate disease severity. *Neurology*. 64(7), 1144–1151 (2005).
7. Rudick RA. A clinically meaningful measure of disability. *Am. Acad. Neurol.* 74(17), S8–S15 (2010).
8. Linker RA, Lee D-H, Demir S, *et al.* Functional role of brain-derived neurotrophic factor in neuroprotective autoimmunity: therapeutic implications in a model of multiple sclerosis. *Brain*. 133(8), 2248–2263 (2010).
9. Thöne J, Ellrichmann G, Seubert S, *et al.* Modulation of autoimmune demyelination by laquinimod via induction of brain-derived neurotrophic factor. *Am. J. Pathol.* 180(1), 267–274 (2012).
10. Azoulay D, Vachapova V, Shihman B, Miler A, Karni A. Lower brain-derived neurotrophic factor in serum of relapsing remitting MS: Reversal by glatiramer acetate. *J. Neuroimmunol.* 167(1–2), 215–218 (2005).
11. Weingarten MD, Lockwood AH, Hwo SY, Kirschner MW. A protein factor essential for microtubule assembly. *Proc. Natl. Acad. Sci. U. S. A.* 72(5), 1858–62 (1975).
12. Avila J, Lucas JJ, Perez M, Hernandez F. Role of tau protein in both physiological and pathological conditions. *Physiol. Rev.* 84(2), 361–384 (2004).
13. Shahani N, Brandt R. Functions and malfunctions of the tau proteins. *Cell. Mol. Life Sci.* 59(10), 1668–1680 (2002).
14. Arai H, Morikawa Y, Higuchi M, *et al.* Cerebrospinal Fluid Tau Levels in Neurodegenerative Diseases with Distinct Tau-Related Pathology. *Biochem. Biophys. Res. Commun.* 236(2), 262–264 (1997).
15. Kapaki E, Paraskevas GP, Michalopoulou M. Protein in Multiple Sclerosis. , 228–232 (2000).
16. M T, A B. Cerebrospinal fluid total tau protein levels in patients with multiple sclerosis. *Acta Neurol. Scand.* (11), 325–330 (2007).
17. Jaworski J, Psujek M, Janczarek M, Szczerbo-Trojanowska M, Bartosik-Psujek H. Total-tau in cerebrospinal fluid of patients with multiple sclerosis decreases in secondary progressive stage of disease and reflects degree of brain atrophy. *Ups. J. Med. Sci.* 117(3), 284–292 (2012).
18. Jiménez-Jiménez FJ, Hernánz A, Medina-Acebrón S, *et al.* Tau protein concentrations in cerebrospinal fluid of patients with amyotrophic lateral sclerosis. *Acta Neurol. Scand.* 111(2), 114–117 (2005).

19. Bartosik-Psujek H, Psujek M, Jaworski J, Stelmasiak Z. Total tau and S100b proteins in different types of multiple sclerosis and during immunosuppressive treatment with mitoxantrone. *Acta Neurol. Scand.* 123(4), 252–256 (2011).
20. Zhang Z, Liu A, Lyles RH, Mukherjee B. Logistic regression analysis of biomarker data subject to pooling and dichotomization. *Stat. Med.* 31(22), 2473–2484 (2012).
21. Azoulay D, Urshansky N, Karni A. Low and dysregulated BDNF secretion from immune cells of MS patients is related to reduced neuroprotection. *J. Neuroimmunol.* 195(1–2), 186–193 (2008).
22. Prokopova B, Hlavacova N, Vlcek M, *et al.* Early cognitive impairment along with decreased stress-induced BDNF in male and female patients with newly diagnosed multiple sclerosis. *J. Neuroimmunol.* 302, 34–40 (2017).
23. Koch MW, Patten S, Berzins S, *et al.* Depression in multiple sclerosis: A long-term longitudinal study. *Mult. Scler.* 1352458514536086- (2014).
24. Boeschoten RE, Braamse AMJ, Beekman ATF, *et al.* Prevalence of depression and anxiety in Multiple Sclerosis: A systematic review and meta-analysis. *J. Neurol. Sci.*, 332–341 (2016).
25. Molendijk ML, Spinhoven P, Polak M, Bus BAA, Penninx BWJH, Elzinga BM. Serum BDNF concentrations as peripheral manifestations of depression: evidence from a systematic review and meta-analyses on 179 associations (N=9484). *Mol. Psychiatry.* 19(7), 791–800 (2014).
26. Bus BAA, Molendijk ML, Tendolkar I, *et al.* Chronic depression is associated with a pronounced decrease in serum brain-derived neurotrophic factor over time. *Mol. Psychiatry.* 20(5), 602–608 (2015).
27. Capkun G, Dahlke F, Lahoz R, *et al.* Mortality and comorbidities in patients with multiple sclerosis compared with a population without multiple sclerosis: An observational study using the US Department of Defense administrative claims database. *Mult. Scler. Relat. Disord.* 4(6), 546–554 (2015).
28. Nikolopoulos GK, Masgala A, Tsiara C, *et al.* Cytokine gene polymorphisms in multiple sclerosis: A meta-analysis of 45 studies including 7379 cases and 8131 controls. *Eur. J. Neurol.* 18(7), 944–951 (2011).
29. Priya PK, Rajappa M, Kattimani S, Mohanraj PS, Revathy G. Association of neurotrophins, inflammation and stress with suicide risk in young adults. *Clin. Chim. Acta.* 457, 41–45 (2016).
30. Strawbridge R, Arnone D, Danese A, Papadopoulos A, Herane Vives A, Cleare AJ. Inflammation and clinical response to treatment in depression: A meta-analysis. *Eur. Neuropsychopharmacol.* 25(10), 1532–1543 (2015).
31. Derkus B, Acar Bozkurt P, Tulu M, Emregul KC, Yucesan C, Emregul E. Simultaneous quantification of Myelin Basic Protein and Tau proteins in cerebrospinal fluid and serum of Multiple Sclerosis patients using nanoimmunosensor. *Biosens. Bioelectron.* .

- 89, 781–788 (2017).
32. Sjögren M, Vanderstichele H, Agren H, *et al.* Tau and Abeta42 in cerebrospinal fluid from healthy adults 21-93 years of age: establishment of reference values. *Clin. Chem.* 47, 1776–1781 (2001).
  33. Frederiksen J, Kristensen K, Bahl JMC, Christiansen M. Tau protein: a possible prognostic factor in optic neuritis and multiple sclerosis. *Mult. Scler.* 18(5), 592–9 (2012).
  34. Ortiz GG, Pacheco-Moisés FP, Macías-Islas MÁ, *et al.* Role of the Blood-Brain Barrier in Multiple Sclerosis. *Arch. Med. Res.* 45(8), 687–697 (2014).
  35. Randall J, Mörtberg E, Provuncher GK, *et al.* Tau proteins in serum predict neurological outcome after hypoxic brain injury from cardiac arrest: Results of a pilot study. *Resuscitation.* 84(3), 351–356 (2013).
  36. McTigue DM, Horner PJ, Stokes BT, Gage FH. Neurotrophin-3 and brain-derived neurotrophic factor induce oligodendrocyte proliferation and myelination of regenerating axons in the contused adult rat spinal cord. *J. Neurosci.* 18(14), 5354–5365 (1998).
